# Supplementary material for: Bisphosphonates and breast cancer survival: a meta-analysis and trial sequential analysis of 81508 participants from 23 prospective epidemiological studies
Source: publisher site journal article supplement (doi:10.18632/aging.203395), 2021-08-10
Supplement: Supplementary file [file aging-v13i15-203395-supplementary-material-SD7.pdf]

## SUPPLEMENTARY TABLES

**Supplementary Table 5. Sensitivity analysis by comparison of the summarised results of the maximally and unadjusted effect estimates using confounding RR.**

| Subgroups                                    | No. of datasets | Unadjusted effect estimates          |                                          | Maximally adjusted effect estimates |                | P-value for heterogeneity between results |
|----------------------------------------------|-----------------|--------------------------------------|------------------------------------------|-------------------------------------|----------------|-------------------------------------------|
|                                              |                 | Pooled RR (95% CIs), <i>P</i> -value | <i>I</i> <sup>2</sup> ( <i>P</i> -value) | Pooled RR (95% CIs)                 | Confounding RR |                                           |
| <b>Overall</b>                               | 23              | 0.708 (0.607, 0.826), <0.001         | 75.73 (<0.001)                           | 0.725 (0.627, 0.839)                | 1.023          | 0.836                                     |
| <b>Study Design</b>                          |                 |                                      |                                          |                                     |                |                                           |
| RCTs                                         | 15              | 0.861 (0.782, 0.948), 0.002          | 0.00 (0.756)                             | 0.892 (0.829, 0.961)                | 1.036          | 0.564                                     |
| Cohorts                                      | 8               | 0.560 (0.398, 0.787), 0.001          | 88.13 (<0.001)                           | 0.570 (0.436, 0.745)                | 1.018          | 0.939                                     |
| <b>Follow-up Duration (year) (Only RCTs)</b> |                 |                                      |                                          |                                     |                |                                           |
| Treatment duration                           | 5               | 0.723 (0.530, 0.986), 0.041          | 0.00 (0.866)                             | 0.930 (0.817, 1.058)                | 1.286          | 0.143                                     |
| Post-treatment 1-2                           | 8               | 0.706 (0.535, 0.930), 0.013          | 44.32 (0.096)                            | 0.780 (0.638, 0.954)                | 1.105          | 0.566                                     |
| Post-treatment 3-4                           | 4               | 0.694 (0.499, 0.966), 0.031          | 41.18 (0.183)                            | 0.718 (0.585, 0.881)                | 1.035          | 0.865                                     |
| Post-treatment >4                            | 7               | 0.868 (0.764, 0.985), 0.028          | 0.00 (0.585)                             | 0.906 (0.832, 0.987)                | 1.044          | 0.583                                     |
| <b>Recurrence Sites</b>                      |                 |                                      |                                          |                                     |                |                                           |
| Bone metastases                              | 12              | 0.748 (0.635, 0.881), 0.001          | 43.00 (0.063)                            | 0.713 (0.602, 0.843)                | 0.953          | 0.688                                     |
| Nonskeletal metastases                       | 9               | 0.841 (0.730, 0.969), 0.016          | 17.04 (0.296)                            | 0.883 (0.768, 1.014)                | 1.050          | 0.632                                     |
| Loco-regional recurrence                     | 10              | 0.835 (0.698, 0.999), 0.048          | 10.15 (0.351)                            | 0.887 (0.771, 1.020)                | 1.062          | 0.603                                     |
| Contralateral recurrence                     | 11              | 0.725 (0.594, 0.885), 0.002          | 0.00 (0.569)                             | 0.775 (0.651, 0.922)                | 1.069          | 0.628                                     |
| <b>Menopausal Status</b>                     |                 |                                      |                                          |                                     |                |                                           |
| Postmenopausal                               | 12              | 0.752 (0.636, 0.889), 0.001          | 37.02 (0.103)                            | 0.737 (0.640, 0.850)                | 0.980          | 0.861                                     |
| Non-postmenopausal                           | 6               | 0.903 (0.685, 1.190), 0.468          | 16.01 (0.313)                            | 0.992 (0.864, 1.139)                | 1.099          | 0.550                                     |
| <b>Type of BPs (Only RCTs)</b>               |                 |                                      |                                          |                                     |                |                                           |
| Zoledronic acid                              | 7               | 0.738 (0.593, 0.920), 0.007          | 0.00 (0.978)                             | 0.892 (0.805, 0.988)                | 1.209          | 0.126                                     |
| Clodronate                                   | 3               | 0.864 (0.681, 1.097), 0.231          | 43.24 (0.184)                            | 0.846 (0.736, 0.971)                | 0.979          | 0.878                                     |

\*Confounding RR was defined as the ratio of the pooled results of the maximally adjusted and the unadjusted effect estimates. If the *P*-value for confounding RR was less than 0.05, the impact of adjustment for confounders on the pooled results was statistically significant; otherwise, the confounding effect of the adjusted factors was small or null. For protective factors, if the confounding RR <1, it indicates that the adjusted confounders have obscured an inverse association; if the confounding RR >1, it indicates that the adjusted confounders have exaggerated an inverse association, and therefore the summarized results of the maximally adjusted data are more conservative.

Abbreviations: BPs, bisphosphonates; CI, confidence interval; RCTs, randomized controlled trials; RR, risk ratio.

**Supplementary Table 6. Sensitivity analysis by E-values for point estimates and upper confidence interval limits.**

| Subgroups                                    | No. of datasets | Conventional meta-analysis  |                             |                             | TSA                          |                             |                             |
|----------------------------------------------|-----------------|-----------------------------|-----------------------------|-----------------------------|------------------------------|-----------------------------|-----------------------------|
|                                              |                 | Pooled RR (95% CIs)         | E-values for point estimate | E-values for Upper CI limit | TSA-corrected RR (95% CIs)   | E-values for point estimate | E-values for Upper CI limit |
| <b>Overall</b>                               | 23              | <b>0.725 (0.627, 0.839)</b> | 2.103                       | 1.670                       | <b>0.700, (0.589, 0.832)</b> | 2.211                       | 1.695                       |
| <b>Study Design</b>                          |                 |                             |                             |                             |                              |                             |                             |
| RCTs                                         | 15              | <b>0.892 (0.829, 0.961)</b> | 1.490                       | 1.246                       | <b>0.923, (0.856, 0.995)</b> | 1.384                       | 1.076                       |
| Cohorts                                      | 8               | <b>0.570 (0.436, 0.745)</b> | 2.905                       | 2.020                       | <b>0.510, (0.318, 0.817)</b> | 3.333                       | 1.748                       |
| <b>Follow-up Duration (year) (Only RCTs)</b> |                 |                             |                             |                             |                              |                             |                             |
| Treatment duration                           | 5               | 0.930 (0.817, 1.058)        | 1.360                       | 1.000                       | 0.905, (0.418, 1.960)        | 1.446                       | 1.000                       |
| Post-treatment 1-2                           | 8               | <b>0.780 (0.638, 0.954)</b> | 1.883                       | 1.273                       | <b>0.774, (0.604, 0.992)</b> | 1.906                       | 1.098                       |
| Post-treatment 3-4                           | 4               | <b>0.718 (0.585, 0.881)</b> | 2.132                       | 1.527                       | 0.798, (0.386, 1.653)        | 1.816                       | 1.000                       |
| Post-treatment >4                            | 7               | <b>0.906 (0.832, 0.987)</b> | 1.442                       | 1.129                       | 0.905, (0.798, 1.027)        | 1.446                       | 1.000                       |
| <b>Recurrence Sites</b>                      |                 |                             |                             |                             |                              |                             |                             |
| Bone metastases                              | 12              | <b>0.713 (0.602, 0.843)</b> | 2.154                       | 1.656                       | <b>0.705, (0.527, 0.943)</b> | 2.189                       | 1.314                       |
| Nonskeletal metastases                       | 9               | 0.883 (0.768, 1.014)        | 1.520                       | 1.000                       | 0.903, (0.684, 1.192)        | 1.452                       | 1.000                       |
| Loco-regional recurrence                     | 10              | 0.887 (0.771, 1.020)        | 1.506                       | 1.000                       | 0.639, (0.380, 1.075)        | 2.505                       | 1.000                       |
| Contralateral recurrence                     | 11              | <b>0.775 (0.651, 0.922)</b> | 1.902                       | 1.388                       | <b>0.722, (0.606, 0.861)</b> | 2.115                       | 1.595                       |
| <b>Menopausal Status</b>                     |                 |                             |                             |                             |                              |                             |                             |
| Postmenopausal                               | 12              | <b>0.737 (0.640, 0.850)</b> | 2.053                       | 1.632                       | <b>0.737, (0.607, 0.895)</b> | 2.053                       | 1.479                       |
| Non-postmenopausal                           | 6               | 0.992 (0.864, 1.139)        | 1.098                       | 1.000                       | NA                           | NA                          | NA                          |
| <b>Type of BPs (Only RCTs)</b>               |                 |                             |                             |                             |                              |                             |                             |
| Zoledronic acid                              | 7               | <b>0.892 (0.805, 0.988)</b> | 1.490                       | 1.123                       | 0.920, (0.790, 1.072)        | 1.394                       | 1.000                       |
| Clodronate                                   | 3               | <b>0.846 (0.736, 0.971)</b> | 1.646                       | 1.205                       | 0.891, (0.555, 1.431)        | 1.493                       | 1.000                       |

\*E-value shows the minimum strength of association that a hypothetical residual confounding factor would need to have with both the use of bisphosphonates and the risk of BCa recurrence to fully explain the observed effect. Note that these calculations assumed an optimal frequency for the hypothetical confounder. For an infrequent confounder, the strength of the associations between the confounder and bisphosphonate use and between the confounder and BCa recurrence risk needs to be much stronger. In the present study, the impact of a hypothetical unmeasured confounder on the observed effect would be small or negligible when the E-value for the summarized point estimate is no less than 1.5.

Abbreviations: BPs, bisphosphonates; CI, confidence interval; RCTs, randomized controlled trials; RR, risk ratio; TSA, trial sequential analysis.
